# Supplementary material for: Geostatistical modelling of malaria indicator survey data to assess the effects of interventions on the geographical distribution of malaria prevalence in children less than 5 years in Uganda
Source: PubMed Central journal article supplement (PMC5380319; doi:10.1371/journal.pone.0174948), 2017-04-04

**S2Fig: Distribution of climatic/environmental factors in Uganda in 2014**

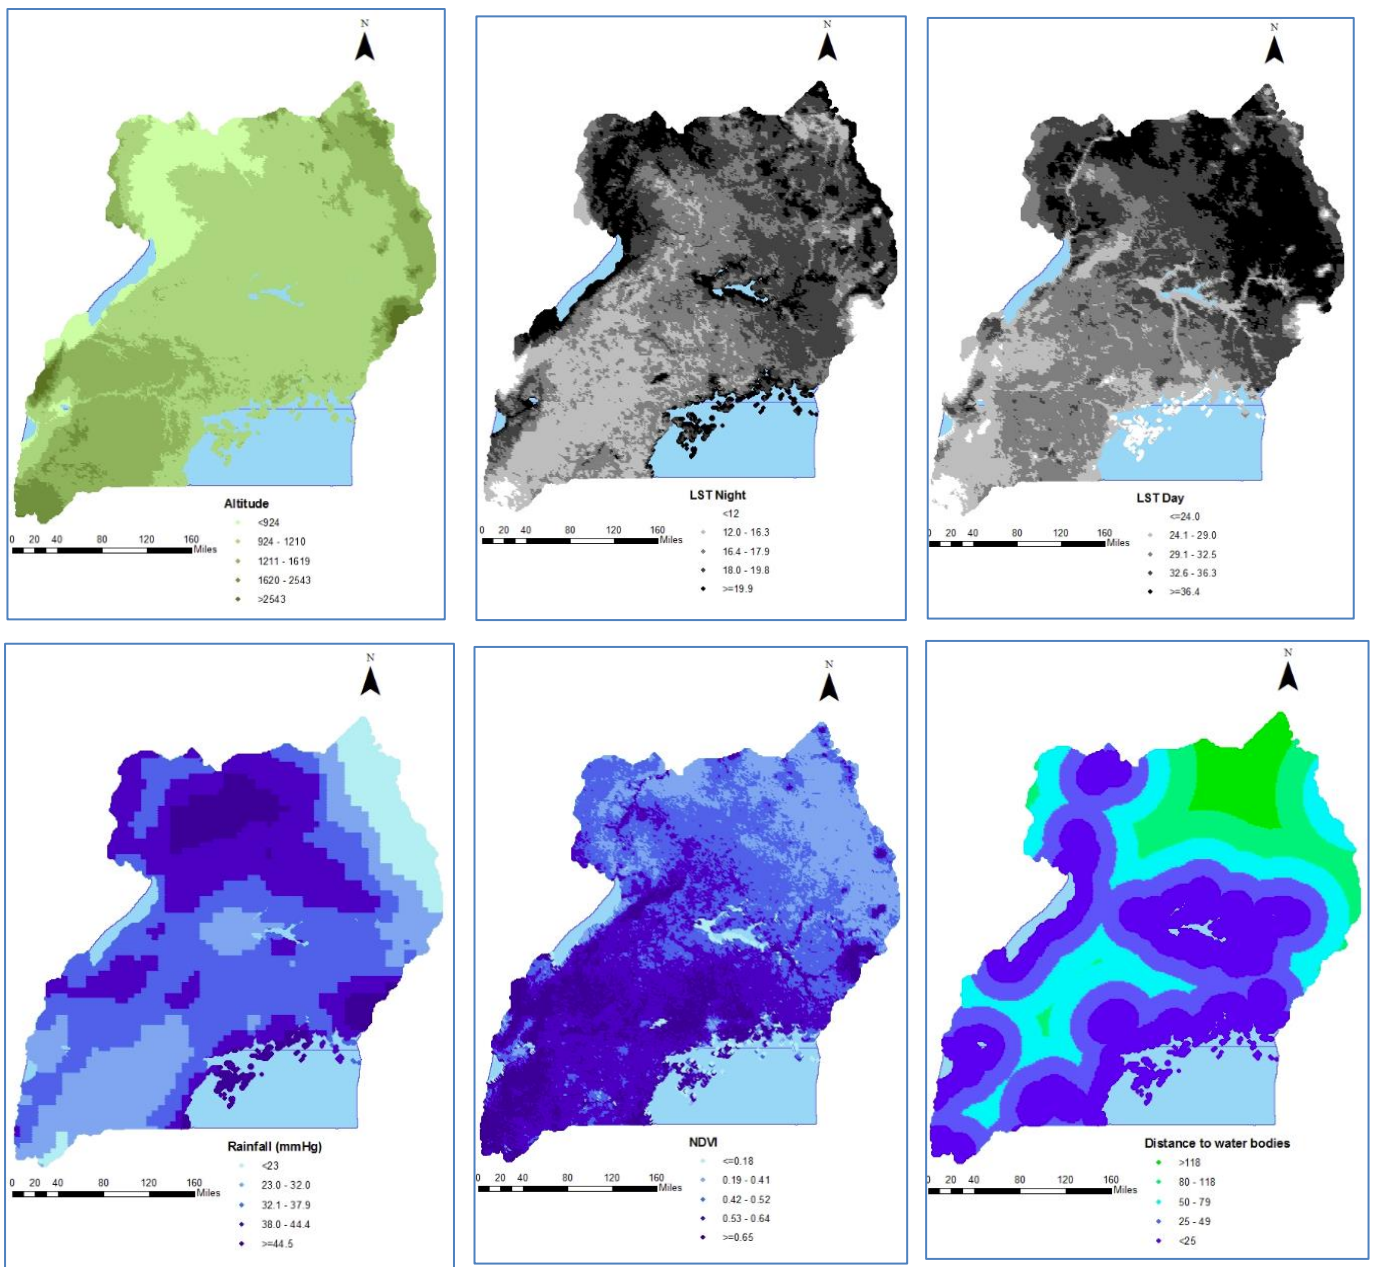

Supplement: pone.0174948.s002.pdf [file pone.0174948.s002.pdf]
